# Supplementary material
Source: MDPI journal article supplement (https://www.mdpi.com/2079-6412/12/5/693)
Supplement: s1 [file s1]

# Supporting Information

## Tribological Behaviors of Polycrystalline Cubic Boron Nitride Sliding against Bearing Steel in Vacuum Condition

Fan Yang <sup>1</sup>, Zhe Wu <sup>2</sup>, Dezhong Meng <sup>3,4,\*</sup>, Wenbo Qin <sup>2,4</sup> and Dingshun She <sup>2,4</sup>

<sup>1</sup> Sinounited Investment Group Corporation Limited, Beijing 101102, China; 747253088@qq.com

<sup>2</sup> School of Engineering and Technology, China University of Geosciences (Beijing), Beijing 100083, China; 215084041@qq.com (Z.W.); qwb\_strive@126.com (W.Q.); shedingshun@163.com (D.S.)

<sup>3</sup> School of Science, China University of Geosciences (Beijing), Beijing 100083, China; mdz604@163.com (D.M.)

<sup>4</sup> Zhengzhou Institute, China University of Geosciences (Beijing), Zhengzhou 451283, China;

\* Correspondence: mdz604@163.com (D.M.); Tel.: +86-10-8232-1062

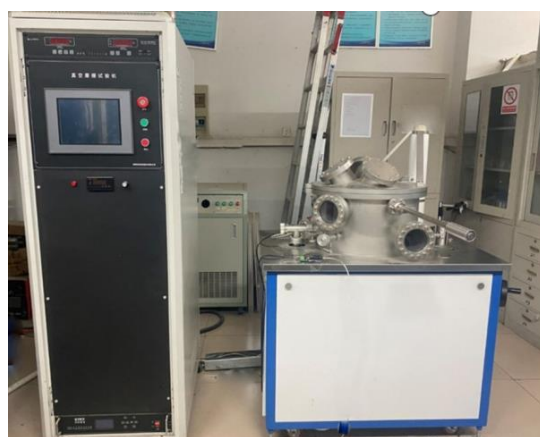

**Figure S1.** The MSTS-1 Multifunctional Vacuum Friction and Wear Testing Machine.
